# Supplementary material
Source: HighWire-hosted journal article supplement (https://bmjopen.bmj.com/content/15/5/e098802)
Supplement: inline-supplementary-material-5 [file inline-supplementary-material-5.pdf]

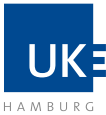

Healthcare situation and disparities of patients with alopecia areata – A mixed methods analysis by Toni Maria Janke, Beke Hester, Katharina Müller, Christine Blome, Theresa Klinger

Supplement Table S3 and S4 Category systems of patients with alopecia areata and dermatologists

Table S3: Category system of patients with AA

| 1 <sup>st</sup> | 2 <sup>nd</sup>                            | 3 <sup>rd</sup> | 4 <sup>th</sup> level of category system |
|-----------------|--------------------------------------------|-----------------|------------------------------------------|
| Health care     |                                            |                 |                                          |
|                 | Therapy Options                            |                 |                                          |
|                 | Local therapies                            |                 |                                          |
|                 | Cryotherapy                                |                 |                                          |
|                 | Pulse therapy                              |                 |                                          |
|                 | PRP                                        |                 |                                          |
|                 | DCP                                        |                 |                                          |
|                 | Further therapy options                    |                 |                                          |
|                 | UV therapy                                 |                 |                                          |
|                 | Cortisone cream / topical cortisone        |                 |                                          |
|                 | Systemic therapies                         |                 |                                          |
|                 | Immunosuppressants                         |                 |                                          |
|                 | Biologics                                  |                 |                                          |
|                 | Further therapy options                    |                 |                                          |
|                 | Cortisone injection                        |                 |                                          |
|                 | Cortisone tablet                           |                 |                                          |
|                 | Other therapies                            |                 |                                          |
|                 | Participation in study                     |                 |                                          |
|                 | Shampoo                                    |                 |                                          |
|                 | Wig and other assistive devices            |                 |                                          |
|                 | Lifestyle change                           |                 |                                          |
|                 | Decision against therapy                   |                 |                                          |
|                 | Therapy-related behaviour and attitude     |                 |                                          |
|                 | Medical consultation                       |                 |                                          |
|                 | With medical consultation                  |                 |                                          |
|                 | Without medical consultation               |                 |                                          |
|                 | Costs and external conditions              |                 |                                          |
|                 | Critical aspects of therapy                |                 |                                          |
|                 | No long-term improvement                   |                 |                                          |
|                 | Lack of continuity                         |                 |                                          |
|                 | Scepticism towards potential side effects  |                 |                                          |
|                 | Lack of information by physician           |                 |                                          |
|                 | Lacking participation in therapy decisions |                 |                                          |
|                 | Scepticism towards medication              |                 |                                          |

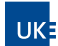

|  |                                                 |
|--|-------------------------------------------------|
|  | Few therapies offered                           |
|  | Mode of administration                          |
|  | Aversion to/caution with cortisone              |
|  | Exclusively symptomatic treatment               |
|  | Testing various therapies and products          |
|  | Taking therapies according to need              |
|  | Escalation steps                                |
|  | <b>Medical providers</b>                        |
|  | Dermatologists                                  |
|  | Monitoring of disease/therapy progression       |
|  | Visits according to need                        |
|  | Loyalty towards practice                        |
|  | Cancer screening                                |
|  | Consultation hour for hair loss                 |
|  | General practitioner                            |
|  | Referral to specialist                          |
|  | Examination at general practitioner             |
|  | No relevant provider                            |
|  | Outpatient clinic                               |
|  | Other physicians                                |
|  | Rheumatologist                                  |
|  | Initial examination                             |
|  | Psychological providers                         |
|  | <b>Non-medical provider</b>                     |
|  | Alternative medical options                     |
|  | Use of alternative medical options              |
|  | No use of alternative medical options           |
|  | Pharmacy                                        |
|  | <b>Aspects and criticism towards healthcare</b> |
|  | Reasons for physician visits                    |
|  | Repeated prescription                           |
|  | Blood tests                                     |
|  | Visibility of AA                                |
|  | No provider visited                             |
|  | Empathy of providers                            |
|  | Lack of empathy / not being taken seriously     |
|  | Empathy / being taken seriously                 |
|  | Competencies of provider                        |
|  | Lack of competencies / expert knowledge         |
|  | Trust in competencies / expert knowledge        |
|  | Availability of physicians                      |
|  | Problems finding good dermatologists            |
|  | Waiting time                                    |
|  | Change of physicians                            |
|  | Due to expertise                                |

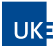

|              |                                     |
|--------------|-------------------------------------|
|              | Due to location                     |
|              | Not changed despite dissatisfaction |
|              | Side effects and contraindications  |
|              | Patient education                   |
| Life with AA |                                     |
|              | <b>Familial case history</b>        |
|              | <b>Misdiagnosis</b>                 |
|              | <b>Triggers</b>                     |
|              | No obvious trigger                  |
|              | Physical changes                    |
|              | Seasonal influence                  |
|              | Infections                          |
|              | Stress                              |
|              | <b>Co-morbidities</b>               |
|              | <b>Information and exchange</b>     |
|              | <b>Spontaneous remission</b>        |
|              | <b>Symptoms</b>                     |
|              | <b>Handling of disease</b>          |
|              | Support by friends and family       |
|              | Acceptance                          |
|              | Everyday life                       |
|              | Hope for spontaneous remission      |
|              | Mental burden                       |
|              | Resignation/frustration             |
|              | Visibility                          |
|              | Feeling uncomfortable               |
|              | Research for causes                 |
|              | Repression                          |
|              | Desperation                         |



Table S4: Category system of dermatologists

| 1 <sup>st</sup>      | 2 <sup>nd</sup>                  | 3 <sup>rd</sup> | 4 <sup>th</sup> level of category system |
|----------------------|----------------------------------|-----------------|------------------------------------------|
| Health care stations |                                  |                 |                                          |
|                      | Dermatologists                   |                 |                                          |
|                      | General practitioner             |                 |                                          |
|                      | Outpatient clinic                |                 |                                          |
|                      | Inpatient clinic visits          |                 |                                          |
|                      | Psychological support            |                 |                                          |
|                      | Alternative medical options      |                 |                                          |
|                      | Pharmacy                         |                 |                                          |
|                      | No previous therapy              |                 |                                          |
|                      | Information and exchange         |                 |                                          |
|                      | Lifestyle change                 |                 |                                          |
|                      | Waiting time                     |                 |                                          |
| Treatment            |                                  |                 |                                          |
|                      | Treatment options                |                 |                                          |
|                      | Local therapies                  |                 |                                          |
|                      | Calcineurin inhibitors           |                 |                                          |
|                      | Cortisone intralesional          |                 |                                          |
|                      | Topical cortisone                |                 |                                          |
|                      | DCP therapy                      |                 |                                          |
|                      | Local therapy - not specified    |                 |                                          |
|                      | PRP therapy                      |                 |                                          |
|                      | UV therapy                       |                 |                                          |
|                      | Further products                 |                 |                                          |
|                      | Systemic therapies               |                 |                                          |
|                      | Biologics                        |                 |                                          |
|                      | Systemic cortisone               |                 |                                          |
|                      | ciclosporin                      |                 |                                          |
|                      | JAK inhibitors                   |                 |                                          |
|                      | Minoxidil                        |                 |                                          |
|                      | MTX                              |                 |                                          |
|                      | New therapies                    |                 |                                          |
|                      | Off-label therapies              |                 |                                          |
|                      | Study inclusion                  |                 |                                          |
|                      | Wigs and other assistive devices |                 |                                          |
|                      | Issues regarding the therapy     |                 |                                          |
|                      | Localisation of the disease      |                 |                                          |
|                      | Limited therapy options          |                 |                                          |
|                      | Non-response to therapies        |                 |                                          |
|                      | Reimbursement of therapies       |                 |                                          |
|                      | Reoccurrence after treatment end |                 |                                          |
|                      | Monitor disease and treatment    |                 |                                          |
|                      | Phasing out therapy              |                 |                                          |



| 1 <sup>st</sup> | 2 <sup>nd</sup> | 3 <sup>rd</sup> | 4 <sup>th</sup> level of category system                  |
|-----------------|-----------------|-----------------|-----------------------------------------------------------|
|                 |                 |                 | Observation of the course of disease                      |
|                 |                 |                 | Disease duration as decision-making criterion             |
|                 |                 |                 | Laboratory examination and diagnostics                    |
|                 |                 |                 | Assessment of scores                                      |
|                 |                 |                 | Tolerability of therapy and side effects                  |
|                 |                 |                 | <b>Spontaneous remission</b>                              |
|                 |                 |                 | <b>Characteristics and life circumstances of patients</b> |
|                 |                 |                 | <b>Patient involvement</b>                                |
|                 |                 |                 | Drug samples for patients                                 |
|                 |                 |                 | Building trust                                            |
|                 |                 |                 | Patient preferences                                       |
|                 |                 |                 | Adherence                                                 |
|                 |                 |                 | Patient education                                         |
|                 |                 |                 | <b>Re-presentation</b>                                    |
|                 |                 |                 | <b>Reasons for visits at dermatologists</b>               |
|                 |                 |                 | Disease symptoms                                          |
|                 |                 |                 | Fear and worry                                            |
|                 |                 |                 | Awareness for disease                                     |
|                 |                 |                 | Infections                                                |
|                 |                 |                 | Information about disease and its causes                  |
|                 |                 |                 | New therapies and treatment options                       |
|                 |                 |                 | Visibility                                                |
|                 |                 |                 | Stress                                                    |
|                 |                 |                 | Desperate search and suffering                            |
|                 |                 |                 | Wish for improvement                                      |
|                 |                 |                 | Time of disease progression                               |
